# Supplementary material for: Characterizing Dissolved Organic Matter and Other Water-Soluble Compounds in Ground Ice of the Russian Arctic: A Focus on Ground Ice Classification within the Carbon Cycle Context
Source: MDPI journal article supplement (doi:10.3390/geosciences14030077), 2024-03-13
Supplement: s1 [file s1]

**Table S1.** Ions concentrations in the ice samples.

| Site       | n  | Statistical parameters | Na <sup>+</sup> | NH <sub>4</sub> <sup>+</sup> | K <sup>+</sup> | Ca <sup>2+</sup> | Mg <sup>2+</sup> | Cl <sup>-</sup> | NO <sub>3</sub> <sup>-</sup> | PO <sub>4</sub> <sup>3-</sup> | SO <sub>4</sub> <sup>2-</sup> | TI     |
|------------|----|------------------------|-----------------|------------------------------|----------------|------------------|------------------|-----------------|------------------------------|-------------------------------|-------------------------------|--------|
| mg/l       |    |                        |                 |                              |                |                  |                  |                 |                              |                               |                               |        |
| SZ.G       | 4  | min                    | 0.21            | 0.01                         | 0.07           | 0.21             | 0.03             | 0.27            | 0.10                         | 0.00                          | 0.07                          | 1.18   |
|            |    | max                    | 0.81            | 0.07                         | 0.67           | 0.73             | 0.09             | 2.66            | 0.18                         | 0.00                          | 0.17                          | 4.50   |
|            |    | average                | 0.44            | 0.04                         | 0.29           | 0.40             | 0.06             | 0.92            | 0.12                         | 0.00                          | 0.11                          | 2.38   |
|            |    | median                 | 0.36            | 0.03                         | 0.22           | 0.34             | 0.06             | 0.37            | 0.11                         | 0.00                          | 0.11                          | 1.93   |
|            |    | SD                     | 0.26            | 0.03                         | 0.26           | 0.24             | 0.02             | 1.16            | 0.04                         | 0.00                          | 0.04                          | 1.52   |
|            |    | CV, %                  | 60.17           | 67.40                        | 89.40          | 60.10            | 40.30            | 126.92          | 29.11                        | 29.46                         | 38.96                         | 63.65  |
| AM.TGI/p   | 9  | min                    | 4.90            | 0.14                         | 0.62           | 0.72             | 0.33             | 6.41            | 0.00                         | 0.00                          | 1.42                          | 17.42  |
|            |    | max                    | 23.34           | 0.42                         | 2.62           | 3.61             | 1.22             | 16.56           | 0.11                         | 0.12                          | 2.94                          | 46.27  |
|            |    | average                | 12.30           | 0.27                         | 1.54           | 1.62             | 0.67             | 10.78           | 0.03                         | 0.06                          | 2.37                          | 29.65  |
|            |    | median                 | 10.37           | 0.25                         | 1.31           | 1.35             | 0.60             | 8.88            | 0.03                         | 0.04                          | 2.61                          | 27.76  |
|            |    | SD                     | 6.81            | 0.10                         | 0.64           | 0.98             | 0.33             | 3.84            | 0.03                         | 0.04                          | 0.57                          | 9.91   |
|            |    | CV, %                  | 55.35           | 36.42                        | 41.49          | 60.47            | 49.73            | 35.64           | 94.33                        | 66.34                         | 23.96                         | 33.41  |
| VD.TGI/p   | 2  | min                    | 1.18            | 0.14                         | 0.22           | 0.35             | 0.06             | 2.76            | 0.02                         | 0.00                          | 0.14                          | 5.05   |
|            |    | max                    | 11.07           | 0.23                         | 1.19           | 0.65             | 0.48             | 8.95            | 0.10                         | 0.07                          | 1.68                          | 24.29  |
|            |    | average                | 6.13            | 0.18                         | 0.71           | 0.50             | 0.27             | 5.85            | 0.06                         | 0.04                          | 0.91                          | 14.67  |
|            |    | median                 | 6.13            | 0.18                         | 0.71           | 0.50             | 0.27             | 5.85            | 0.06                         | 0.04                          | 0.91                          | 14.67  |
|            |    | SD                     | 6.99            | 0.06                         | 0.68           | 0.22             | 0.30             | 4.38            | 0.06                         | 0.05                          | 1.10                          | 13.60  |
|            |    | CV, %                  | 114.12          | 33.52                        | 96.92          | 43.09            | 109.99           | 74.81           | 100.67                       | 133.45                        | 120.43                        | 92.76  |
| MS.TGI/p   | 3  | min                    | 1.35            | 0.04                         | 0.10           | 0.47             | 0.12             | 2.04            | 0.02                         | 0.00                          | 0.18                          | 6.08   |
|            |    | max                    | 3.69            | 0.11                         | 0.78           | 0.78             | 0.18             | 3.64            | 0.05                         | 0.09                          | 0.22                          | 7.71   |
|            |    | average                | 2.65            | 0.08                         | 0.54           | 0.66             | 0.16             | 2.67            | 0.03                         | 0.03                          | 0.20                          | 7.05   |
|            |    | median                 | 2.91            | 0.08                         | 0.74           | 0.73             | 0.18             | 2.35            | 0.02                         | 0.01                          | 0.20                          | 7.36   |
|            |    | SD                     | 1.19            | 0.04                         | 0.38           | 0.17             | 0.03             | 0.85            | 0.02                         | 0.05                          | 0.02                          | 0.86   |
|            |    | CV, %                  | 44.95           | 47.64                        | 70.39          | 24.98            | 20.04            | 31.76           | 57.83                        | 154.65                        | 10.50                         | 12.18  |
| F.TGI/p    | 4  | min                    | 5.02            | 0.70                         | 0.31           | 1.73             | 0.54             | 15.58           | 0.03                         | 0.00                          | 5.18                          | 32.06  |
|            |    | max                    | 20.56           | 2.66                         | 1.05           | 9.06             | 2.07             | 22.58           | 0.19                         | 0.04                          | 34.31                         | 84.46  |
|            |    | average                | 11.89           | 1.79                         | 0.70           | 4.00             | 1.54             | 19.72           | 0.09                         | 0.02                          | 18.06                         | 57.85  |
|            |    | median                 | 11.00           | 1.89                         | 0.72           | 2.60             | 1.77             | 20.36           | 0.08                         | 0.02                          | 16.37                         | 57.45  |
|            |    | SD                     | 6.65            | 0.81                         | 0.37           | 3.41             | 0.69             | 3.38            | 0.07                         | 0.02                          | 12.72                         | 21.57  |
|            |    | CV, %                  | 55.90           | 45.47                        | 52.68          | 85.20            | 45.01            | 17.13           | 79.16                        | 80.58                         | 70.44                         | 37.29  |
| VD.TGI/imp | 13 | min                    | 8.34            | 0.27                         | 0.96           | 0.79             | 1.00             | 15.52           | 0.02                         | 0.19                          | 0.85                          | 32.78  |
|            |    | max                    | 189.04          | 1.95                         | 5.19           | 4.47             | 5.35             | 262.49          | 0.58                         | 1.48                          | 11.69                         | 469.54 |
|            |    | average                | 104.85          | 1.20                         | 3.28           | 1.93             | 2.64             | 129.90          | 0.20                         | 0.73                          | 2.57                          | 247.71 |
|            |    | median                 | 106.31          | 1.08                         | 3.33           | 2.06             | 2.60             | 124.47          | 0.17                         | 0.69                          | 1.58                          | 238.67 |
|            |    | SD                     | 50.83           | 0.56                         | 1.17           | 1.02             | 1.22             | 73.13           | 0.16                         | 0.38                          | 2.88                          | 124.16 |
|            |    | CV, %                  | 48.48           | 46.51                        | 35.79          | 52.93            | 46.09            | 56.30           | 81.42                        | 51.86                         | 112.18                        | 50.12  |
| VD.HW      | 4  | min                    | 0.79            | 0.32                         | 0.41           | 0.47             | 0.28             | 1.60            | 0.13                         | 0.03                          | 0.30                          | 5.77   |

| Site   | n  | Statistical parameters | Na <sup>+</sup> | NH <sub>4</sub> <sup>+</sup> | K <sup>+</sup> | Ca <sup>2+</sup> | Mg <sup>2+</sup> | Cl <sup>-</sup> | NO <sub>3</sub> <sup>-</sup> | PO <sub>4</sub> <sup>3-</sup> | SO <sub>4</sub> <sup>2-</sup> | TI     |
|--------|----|------------------------|-----------------|------------------------------|----------------|------------------|------------------|-----------------|------------------------------|-------------------------------|-------------------------------|--------|
| mg/l   |    |                        |                 |                              |                |                  |                  |                 |                              |                               |                               |        |
|        |    | max                    | 7.19            | 5.17                         | 1.33           | 2.70             | 1.80             | 3.89            | 0.57                         | 0.05                          | 0.82                          | 15.20  |
|        |    | average                | 3.17            | 1.82                         | 0.74           | 1.22             | 0.76             | 2.68            | 0.31                         | 0.04                          | 0.56                          | 11.31  |
|        |    | median                 | 2.35            | 0.89                         | 0.60           | 0.86             | 0.48             | 2.61            | 0.26                         | 0.04                          | 0.57                          | 12.13  |
|        |    | SD                     | 2.79            | 2.27                         | 0.40           | 1.01             | 0.71             | 1.05            | 0.19                         | 0.01                          | 0.23                          | 4.68   |
|        |    | CV, %                  | 87.86           | 124.94                       | 54.61          | 82.34            | 93.49            | 39.40           | 61.02                        | 26.69                         | 41.58                         | 41.37  |
|        |    |                        |                 |                              |                |                  |                  |                 |                              |                               |                               |        |
| VD.LPW | 15 | min                    | 2.28            | 0.24                         | 0.35           | 0.32             | 0.19             | 1.10            | 0.00                         | 0.00                          | 0.95                          | 5.85   |
|        |    | max                    | 18.85           | 0.67                         | 1.33           | 2.00             | 0.85             | 17.31           | 0.54                         | 0.09                          | 14.04                         | 47.87  |
|        |    | average                | 10.74           | 0.41                         | 0.89           | 0.85             | 0.50             | 8.80            | 0.17                         | 0.03                          | 6.74                          | 29.16  |
|        |    | median                 | 11.12           | 0.35                         | 0.93           | 0.67             | 0.58             | 9.91            | 0.13                         | 0.02                          | 6.66                          | 32.37  |
|        |    | SD                     | 4.80            | 0.16                         | 0.30           | 0.41             | 0.22             | 4.70            | 0.16                         | 0.03                          | 4.17                          | 13.08  |
|        |    | CV, %                  | 44.69           | 38.24                        | 33.66          | 48.05            | 42.93            | 53.35           | 94.23                        | 104.67                        | 61.80                         | 44.86  |
| F.HW   | 16 | min                    | 3.50            | 0.06                         | 0.37           | 1.07             | 0.80             | 6.12            | 0.05                         | 0.00                          | 1.24                          | 17.10  |
|        |    | max                    | 51.31           | 1.06                         | 3.38           | 3.82             | 5.23             | 100.50          | 0.52                         | 0.69                          | 22.25                         | 188.04 |
|        |    | average                | 11.09           | 0.41                         | 1.33           | 2.33             | 1.91             | 26.10           | 0.20                         | 0.13                          | 4.24                          | 47.91  |
|        |    | median                 | 6.94            | 0.35                         | 1.12           | 2.32             | 1.62             | 16.61           | 0.16                         | 0.02                          | 2.44                          | 32.45  |
|        |    | SD                     | 11.88           | 0.30                         | 0.78           | 0.88             | 1.13             | 23.56           | 0.14                         | 0.21                          | 5.13                          | 42.71  |
|        |    | CV, %                  | 107.15          | 74.93                        | 58.48          | 37.80            | 59.38            | 90.25           | 71.00                        | 157.22                        | 121.04                        | 89.15  |
| F.LPW  | 8  | min                    | 4.02            | 0.52                         | 0.98           | 2.03             | 1.33             | 6.73            | 0.07                         | 0.00                          | 4.18                          | 22.50  |
|        |    | max                    | 47.03           | 2.34                         | 2.57           | 6.34             | 8.75             | 76.66           | 0.22                         | 0.66                          | 131.65                        | 246.71 |
|        |    | average                | 19.69           | 1.14                         | 1.77           | 3.90             | 4.26             | 35.14           | 0.13                         | 0.22                          | 39.84                         | 106.27 |
|        |    | median                 | 15.44           | 1.08                         | 1.80           | 3.78             | 4.04             | 29.41           | 0.11                         | 0.13                          | 28.55                         | 81.26  |
|        |    | SD                     | 13.95           | 0.58                         | 0.47           | 1.58             | 2.36             | 21.38           | 0.05                         | 0.28                          | 40.84                         | 74.27  |
|        |    | CV, %                  | 70.85           | 50.88                        | 26.31          | 40.46            | 55.38            | 60.85           | 42.90                        | 124.62                        | 102.50                        | 69.89  |

**Table S2.** Gases and bulk biogeochemical components in ice samples.

| Site     | n | Statistical parameters | Fraction | CO <sub>2</sub> | CH <sub>4</sub> | DOC   | DIC   | DIN   |
|----------|---|------------------------|----------|-----------------|-----------------|-------|-------|-------|
|          |   |                        | %        | ppmV            |                 | mg/l  |       |       |
| SZ.G     | 4 | min                    | 0.01     | 45.07           | 0.11            | 1.05  | 0.49  | 0.03  |
|          |   | max                    | 0.01     | 63.26           | 1.10            | 1.75  | 1.71  | 0.06  |
|          |   | average                | 0.01     | 53.73           | 0.40            | 1.39  | 0.92  | 0.04  |
|          |   | median                 | 0.01     | 53.30           | 0.19            | 1.38  | 0.74  | 0.03  |
|          |   | SD                     | 0.00     | 9.22            | 0.47            | 0.31  | 0.54  | 0.01  |
|          |   | CV, %                  | 0.00     | 17.16           | 117.76          | 21.95 | 58.83 | 38.10 |
| AM.TGI/p | 9 | min                    | 0.33     | 43.12           | 3.16            | 0.84  | 3.87  | 0.10  |

| Site       | n  | Statistical parameters | Fraction % | CO <sub>2</sub> ppmV | CH <sub>4</sub> | DOC    | DIC mg/l | DIN    |
|------------|----|------------------------|------------|----------------------|-----------------|--------|----------|--------|
|            |    | max                    | 2.51       | 270.55               | 12.14           | 5.02   | 7.44     | 0.29   |
|            |    | average                | 1.26       | 84.37                | 5.44            | 2.47   | 5.24     | 0.18   |
|            |    | median                 | 0.86       | 55.62                | 4.55            | 1.74   | 4.80     | 0.17   |
|            |    | SD                     | 0.85       | 73.18                | 2.72            | 1.71   | 1.23     | 0.06   |
|            |    | CV, %                  | 67.52      | 86.75                | 49.96           | 67.02  | 23.48    | 35.22  |
| VD.TGI/p   | 2  | min                    | 0.13       | 853.87               | 476.60          | 0.92   | 0.19     | 0.10   |
|            |    | max                    | 3.49       | 1019.13              | 1490.72         | 5.79   | 5.47     | 0.16   |
|            |    | average                | 1.81       | 936.50               | 983.66          | 3.36   | 2.83     | 0.13   |
|            |    | median                 | 1.81       | 936.50               | 983.66          | 3.36   | 2.83     | 0.13   |
|            |    | SD                     | 2.38       | 116.86               | 717.09          | 2.435  | 3.73     | 0.05   |
|            |    | CV, %                  | 131.38     | 12.48                | 72.90           | 72.58  | 131.93   | 35.77  |
| MS.TGI/p   | 3  | min                    | 0.01       | 200.48               | 9.83            | 1.22   | 0.77     | 0.03   |
|            |    | max                    | 0.01       | 633.83               | 69.13           | 2.28   | 0.98     | 0.73   |
|            |    | average                | 0.01       | 360.35               | 34.23           | 1.67   | 0.86     | 0.27   |
|            |    | median                 | 0.01       | 246.74               | 23.72           | 1.51   | 0.84     | 0.06   |
|            |    | SD                     | 0          | 237.97               | 31.01           | 0.55   | 0.10     | 0.40   |
|            |    | CV, %                  | 0          | 66.04                | 90.60           | 32.80  | 12.09    | 145.79 |
| F.TGI/p    | 4  | min                    | 0.02       | 49.27                | 1.51            | 1.67   | 0.79     | 0.49   |
|            |    | max                    | 0.54       | 191.40               | 11.21           | 6.45   | 2.51     | 1.79   |
|            |    | average                | 0.21       | 85.93                | 4.08            | 4.23   | 1.41     | 1.21   |
|            |    | median                 | 0.14       | 51.53                | 1.79            | 4.40   | 1.18     | 1.27   |
|            |    | SD                     | 0.23       | 70.32                | 4.76            | 2.12   | 0.76     | 0.54   |
|            |    | CV, %                  | 112.29     | 81.84                | 116.71          | 50.22  | 53.86    | 44.54  |
| VD.TGI/imp | 13 | min                    | 16.23      | 391.93               | 1357.91         | 33.21  | 7.29     | 0.18   |
|            |    | max                    | 68.65      | 2430.94              | 32281.65        | 111.00 | 35.80    | 1.33   |
|            |    | average                | 42.01      | 1044.57              | 8960.32         | 65.41  | 18.89    | 0.83   |
|            |    | median                 | 39.96      | 786.35               | 5075.57         | 66.65  | 16.73    | 0.73   |
|            |    | SD                     | 13.83      | 619.06               | 9841.92         | 20.01  | 7.44     | 0.38   |
|            |    | CV, %                  | 32.91      | 59.26                | 109.84          | 30.60  | 39.42    | 46.56  |
| VD.HW      | 4  | min                    | 0.03       | 1276.51              | 6.90            | 5.53   | 0.67     | 0.27   |
|            |    | max                    | 7.44       | 3539.96              | 418.14          | 84.39  | 3.38     | 3.48   |
|            |    | average                | 1.92       | 2162.75              | 110.59          | 27.39  | 1.75     | 1.22   |
|            |    | median                 | 0.11       | 1917.27              | 8.66            | 9.81   | 1.21     | 0.56   |
|            |    | SD                     | 3.68       | 973.10               | 205.04          | 38.06  | 1.43     | 1.52   |
|            |    | CV, %                  | 191.38     | 44.99                | 185.40          | 138.98 | 81.81    | 124.42 |
| VD.LPW     | 15 | min                    | 2.60       | 52.63                | 372.18          | 3.93   | 1.00     | 0.16   |
|            |    | max                    | 6.73       | 1529.85              | 14138.08        | 19.70  | 5.88     | 0.50   |

| Site  | n  | Statistical parameters | Fraction % | CO <sub>2</sub> | CH <sub>4</sub> | DOC   | DIC   | DIN   |
|-------|----|------------------------|------------|-----------------|-----------------|-------|-------|-------|
|       |    |                        |            | ppmV            |                 |       | mg/l  |       |
|       |    | average                | 4.11       | 610.95          | 7241.99         | 11.91 | 3.49  | 0.29  |
|       |    | median                 | 3.74       | 482.25          | 3009.33         | 10.71 | 3.43  | 0.24  |
|       |    | SD                     | 1.20       | 470.00          | 10851.65        | 4.88  | 1.35  | 0.11  |
|       |    | CV, %                  | 29.08      | 76.87           | 149.84          | 40.96 | 38.50 | 38.03 |
|       |    | min                    | 0.21       | 49.61           | 0.42            | 3.50  | 0.87  | 0.05  |
|       |    | max                    | 11.38      | 379.61          | 50.75           | 13.59 | 5.66  | 0.74  |
| F.HW  | 16 | average                | 1.73       | 171.41          | 14.72           | 7.82  | 2.50  | 0.29  |
|       |    | median                 | 1.15       | 115.58          | 5.46            | 7.61  | 2.13  | 0.26  |
|       |    | SD                     | 2.67       | 131.03          | 16.19           | 2.86  | 1.26  | 0.21  |
|       |    | CV, %                  | 154.20     | 76.44           | 110.00          | 36.52 | 50.52 | 72.64 |
|       |    | min                    | 0.24       | 445.53          | 0.39            | 10.52 | 1.63  | 0.37  |
|       |    | max                    | 8.63       | 1547.98         | 4.28            | 17.71 | 3.02  | 1.58  |
| F.LPW | 8  | average                | 1.61       | 885.90          | 1.74            | 13.58 | 2.42  | 0.78  |
|       |    | median                 | 0.35       | 758.89          | 1.30            | 13.01 | 2.51  | 0.74  |
|       |    | SD                     | 2.91       | 383.06          | 1.50            | 2.62  | 0.53  | 0.39  |
|       |    | CV, %                  | 180.50     | 43.24           | 85.90           | 19.31 | 21.93 | 49.84 |

**Table S3. EEM-DOM PARAFAC components loadings**

| Site         | n | Statistical parameters | P1    | P2    | P3     | P4    | Psum  |
|--------------|---|------------------------|-------|-------|--------|-------|-------|
|              |   |                        |       | RU*10 |        |       |       |
|              |   | min                    | 0.02  | 0.01  | 0.00   | 0.23  | 0.28  |
|              |   | max                    | 0.06  | 0.01  | 0.01   | 0.43  | 0.51  |
| SZ.G         | 4 | average                | 0.04  | 0.01  | 0.00   | 0.31  | 0.36  |
|              |   | median                 | 0.03  | 0.01  | 0.00   | 0.30  | 0.33  |
|              |   | SD                     | 0.02  | 0.00  | 0.00   | 0.09  | 0.10  |
|              |   | CV, %                  | 46.56 | 14.39 | 167.40 | 27.15 | 27.93 |
|              |   | min                    | 0.44  | 0.48  | 0.08   | 0.16  | 1.29  |
|              |   | max                    | 0.70  | 3.77  | 0.34   | 0.78  | 5.00  |
| AM.TGI/<br>p | 9 | average                | 0.53  | 1.43  | 0.18   | 0.31  | 2.44  |
|              |   | median                 | 0.48  | 0.88  | 0.14   | 0.21  | 1.81  |
|              |   | SD                     | 0.09  | 1.20  | 0.10   | 0.20  | 1.31  |
|              |   | CV, %                  | 17.05 | 83.97 | 54.29  | 65.65 | 53.54 |
|              |   | min                    | 0.09  | 0.05  | 0.01   | 0.14  | 0.29  |
|              |   | max                    | 1.30  | 1.20  | 0.09   | 0.16  | 2.76  |
| VD.TGI/<br>p | 2 | average                | 0.70  | 0.63  | 0.05   | 0.15  | 1.53  |
|              |   | median                 | 0.70  | 0.63  | 0.05   | 0.15  | 1.53  |
|              |   | SD                     | 0.86  | 0.82  | 0.06   | 0.02  | 1.75  |

| Site           | n  | Statistical parameters | P1     | P2     | P3     | P4    | Psum   |
|----------------|----|------------------------|--------|--------|--------|-------|--------|
|                |    |                        | RU*10  |        |        |       |        |
|                |    | CV, %                  | 122.36 | 131.02 | 109.26 | 10.32 | 114.56 |
| MS.TGI/<br>p   | 3  | min                    | 0.05   | 0.02   | 0.00   | 0.14  | 0.22   |
|                |    | max                    | 0.06   | 0.04   | 0.01   | 0.52  | 0.60   |
|                |    | average                | 0.05   | 0.03   | 0.01   | 0.32  | 0.41   |
|                |    | median                 | 0.05   | 0.03   | 0.01   | 0.30  | 0.40   |
|                |    | SD                     | 0.01   | 0.01   | 0.01   | 0.19  | 0.19   |
|                |    | CV, %                  | 10.89  | 39.84  | 76.15  | 58.55 | 46.54  |
| F.TGI/p        | 4  | min                    | 0.07   | 0.03   | 0.00   | 0.17  | 0.51   |
|                |    | max                    | 0.27   | 0.21   | 0.06   | 0.40  | 0.76   |
|                |    | average                | 0.19   | 0.13   | 0.03   | 0.26  | 0.62   |
|                |    | median                 | 0.21   | 0.14   | 0.04   | 0.23  | 0.60   |
|                |    | SD                     | 0.09   | 0.07   | 0.02   | 0.10  | 0.11   |
|                |    | CV, %                  | 45.94  | 55.58  | 68.08  | 38.46 | 18.21  |
| VD.TGI/i<br>mp | 13 | min                    | 4.05   | 7.04   | 0.30   | 0.07  | 12.05  |
|                |    | max                    | 15.39  | 32.40  | 2.49   | 0.62  | 48.56  |
|                |    | average                | 10.76  | 18.28  | 1.46   | 0.31  | 30.81  |
|                |    | median                 | 11.63  | 17.74  | 1.31   | 0.27  | 31.26  |
|                |    | SD                     | 3.59   | 7.56   | 0.61   | 0.18  | 10.65  |
|                |    | CV, %                  | 33.36  | 41.36  | 41.84  | 56.63 | 34.55  |
| VD.HW          | 4  | min                    | 1.64   | 4.60   | 0.31   | 0.00  | 6.91   |
|                |    | max                    | 9.85   | 28.84  | 5.00   | 0.08  | 43.73  |
|                |    | average                | 4.31   | 13.95  | 1.62   | 0.04  | 19.91  |
|                |    | median                 | 2.87   | 11.17  | 0.58   | 0.04  | 14.51  |
|                |    | SD                     | 3.82   | 10.92  | 2.27   | 0.03  | 16.86  |
|                |    | CV, %                  | 88.65  | 78.32  | 140.07 | 74.95 | 84.66  |
| VD.LPW         | 15 | min                    | 0.37   | 0.43   | 0.09   | 0.06  | 0.95   |
|                |    | max                    | 3.53   | 7.55   | 1.41   | 0.28  | 12.77  |
|                |    | average                | 1.43   | 2.94   | 0.60   | 0.16  | 5.12   |
|                |    | median                 | 1.38   | 2.62   | 0.59   | 0.14  | 4.69   |
|                |    | SD                     | 0.72   | 1.59   | 0.29   | 0.08  | 2.63   |
|                |    | CV, %                  | 50.27  | 54.13  | 48.38  | 51.10 | 51.33  |
| F.HW           | 16 | min                    | 0.59   | 1.29   | 0.23   | 0.11  | 2.36   |
|                |    | max                    | 1.49   | 5.98   | 0.97   | 0.31  | 8.45   |
|                |    | average                | 1.03   | 3.10   | 0.53   | 0.19  | 4.86   |
|                |    | median                 | 0.95   | 2.60   | 0.48   | 0.20  | 4.12   |

| Site  | n | Statistical parameters | P1    | P2    | P3    | P4    | Psum  |
|-------|---|------------------------|-------|-------|-------|-------|-------|
|       |   |                        | RU*10 |       |       |       |       |
|       |   | SD                     | 0.28  | 1.50  | 0.21  | 0.06  | 1.91  |
|       |   | CV, %                  | 27.00 | 48.25 | 39.16 | 30.96 | 39.29 |
| F.LPW | 8 | min                    | 0.90  | 1.52  | 0.41  | 0.12  | 3.14  |
|       |   | max                    | 3.15  | 13.30 | 2.46  | 0.46  | 18.46 |
|       |   | average                | 2.17  | 6.28  | 1.39  | 0.26  | 10.11 |
|       |   | median                 | 2.23  | 4.55  | 1.31  | 0.27  | 8.37  |
|       |   | SD                     | 0.77  | 4.04  | 0.66  | 0.10  | 5.05  |
|       |   | CV, %                  | 35.28 | 64.31 | 47.37 | 39.01 | 49.95 |
|       |   |                        |       |       |       |       |       |

**Table S4.** Pearson correlation coefficients matrix of the EEM-DOM PARAFAC Components.

|    | P1   | P2   | P3   |
|----|------|------|------|
| P1 |      |      |      |
| P2 | 0.96 |      |      |
| P3 | 0.85 | 0.90 |      |
| P4 | 0.34 | 0.31 | 0.34 |
